# Supplementary material for: Development of non-alcoholic steatohepatitis is associated with gut microbiota but not oxysterol synthesis
Source: bioRxiv or medRxiv preprint supplement (doi:10.1101/2022.12.02.518833), 2022-12-02

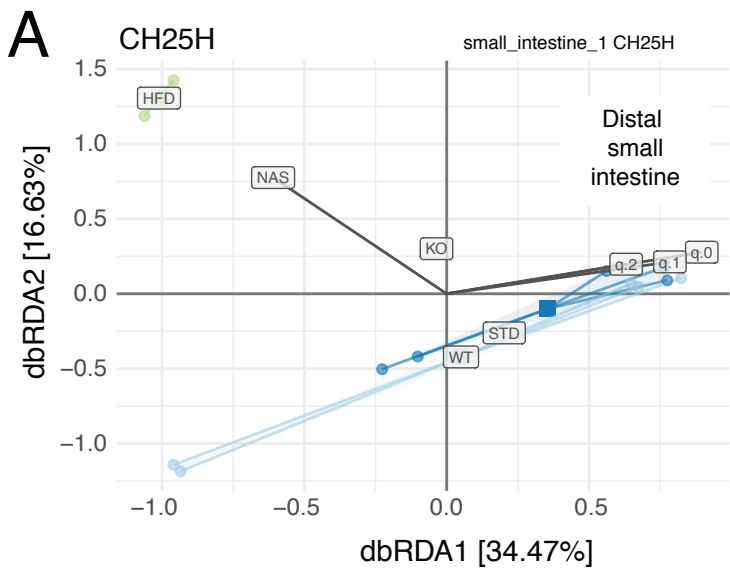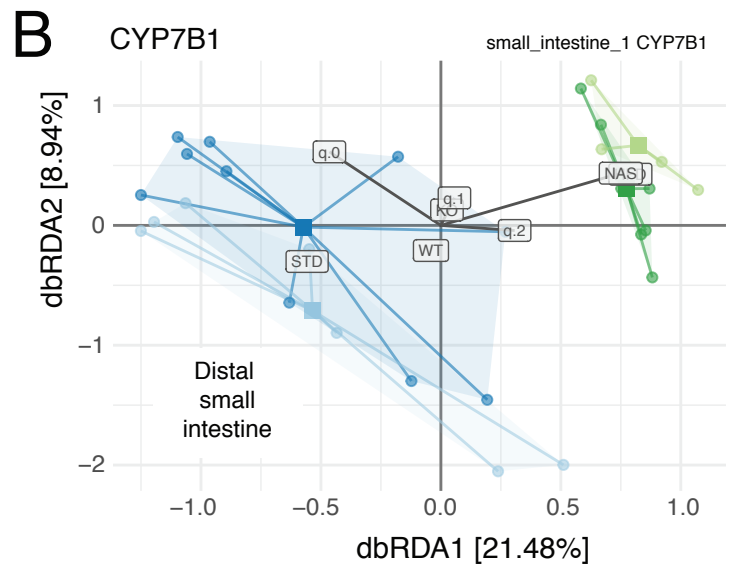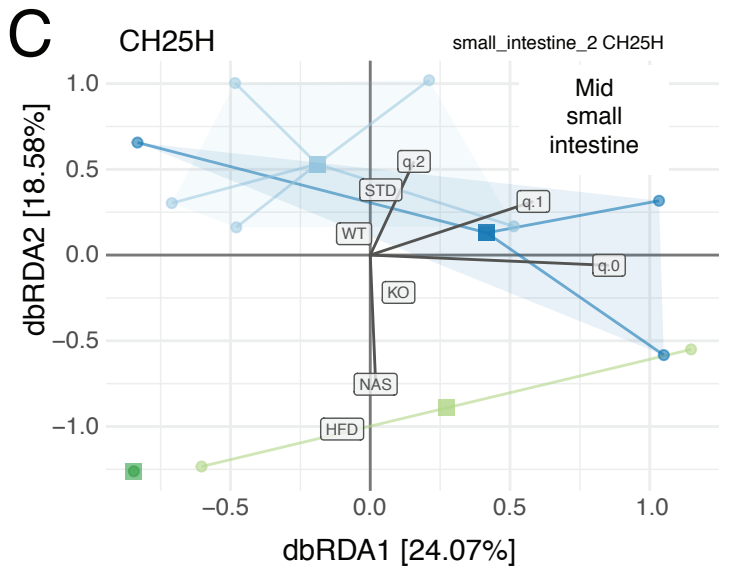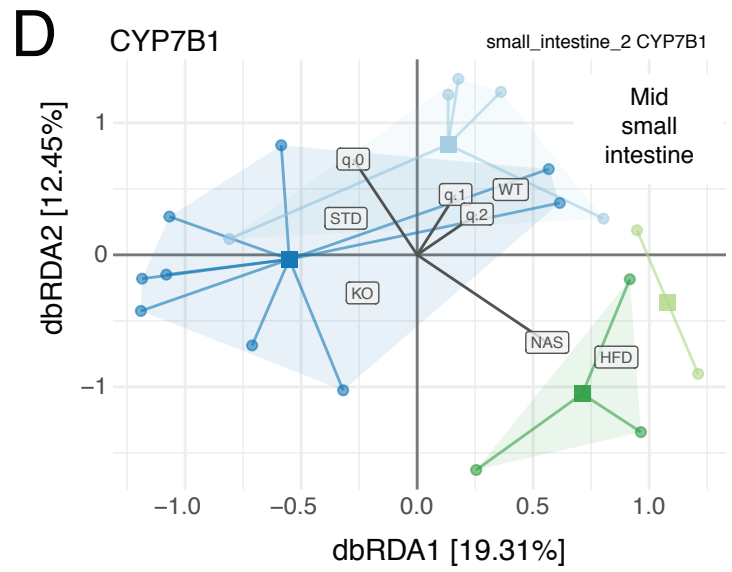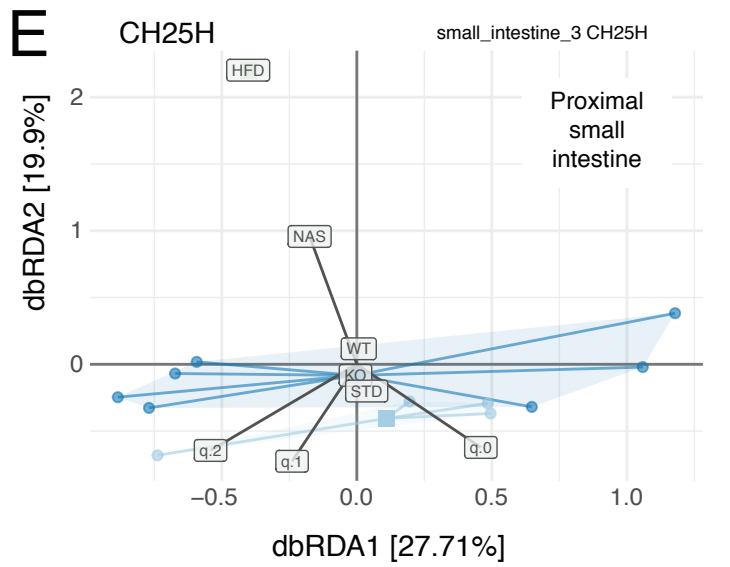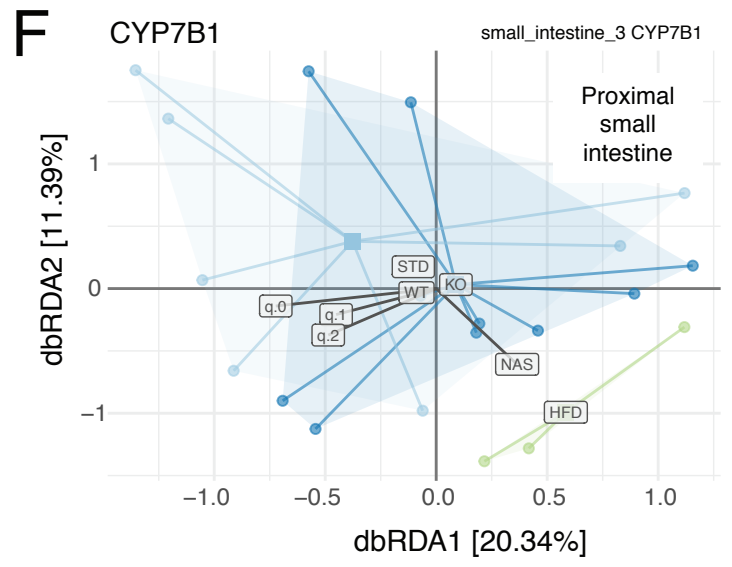

Supplement: Supplementary file [file media-3.pdf]
